# Supplementary material for: Cloning, expression in Pichia pastoris, and characterization of a thermostable GH5 mannan endo-1,4-β-mannosidase from Aspergillus niger BK01
Source: PubMed Central journal article supplement (PMC2780388; doi:10.1186/1475-2859-8-59), 2009-11-13
Supplement: 1475-2859-8-59-S1.pdf [file 1475-2859-8-59-S1.pdf]

>A.nigerBK01 Mannanase

MKLSNALLTLASLALANVSTALPKASPAPSTSSSAASTSFASSTGLQFTIDGETGYFAGTNSYWIGFLTDNADVDL  
VMGHLKSSGLKILRVWGFNDVTSQPSSGTVWYQLHQDGKSTINTGADGLQLDYVVSSAEQHDIKLIINFVNYWTD  
YGGMSAYVSAYGSGETDFYTSDTMQSAYQTYIKTVVERYSNSSAVFAWELANEPKPCSDTSVLYNWIEKTSKFI  
KGLDADMVCIGDEGFGLNIDSDGSYPYQFSEGLNFTMNLDIDTIDFGTLHLYPDSWGTSDDWGNGWITAHGAACK  
AAGKPCLLEEYGVTSNHCSVEGAWQKTALSTTGVGADLFWQYGDDLSTGKSPDDGNTIYYGTSQCLVTDHVAAI  
GSA
